# Supplementary material
Source: PubMed Central journal article supplement (PMC9112750)
Supplement: Supplementary_material.pdf [file Supplementary_material.pdf]

**Supplementary Figure 3:** Internal and External Rotation Assessment Table Blueprint. This table was used to assist in standardizing assessment of range of motion and strength of internal and external rotation.

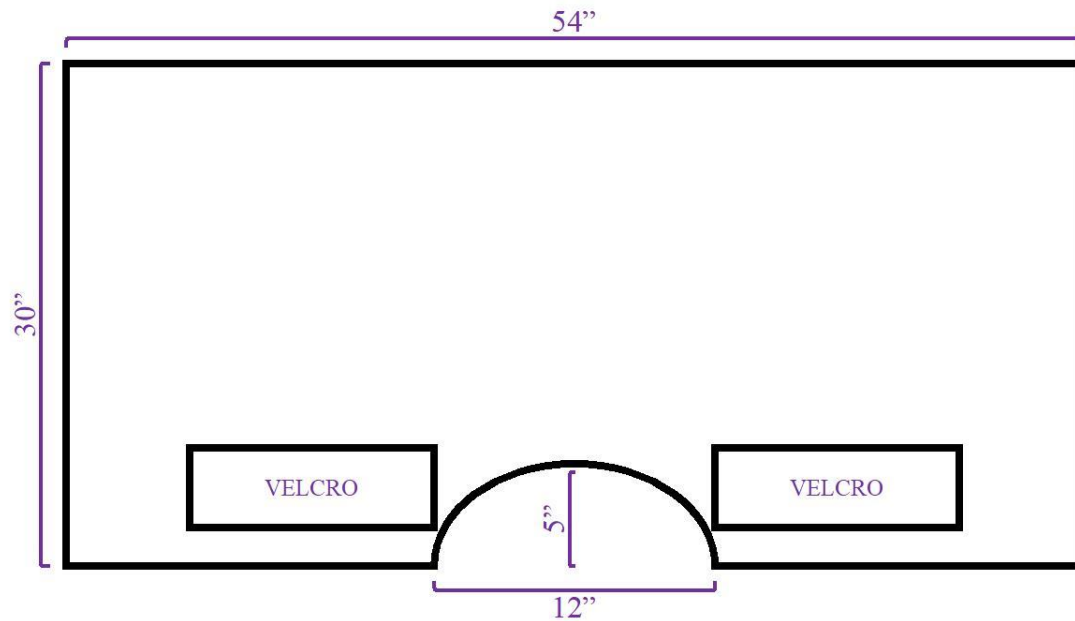

**Supplementary Figure 4:** Internal and External Rotation Assessment Table. This table was constructed from wooden particle board and used to assess range of motion and strength of internal and external rotation. The participant's torso was positioned within the curve and the table height was adjusted to the resting height of the olecranon process with the elbows flexed to 90°. The participant wore a stockinette under a Velcro sensitive neoprene elbow cuff. The thenar eminence was aligned with their umbilicus and the olecranon process was secured by Velcro to a rotating disc on the table.

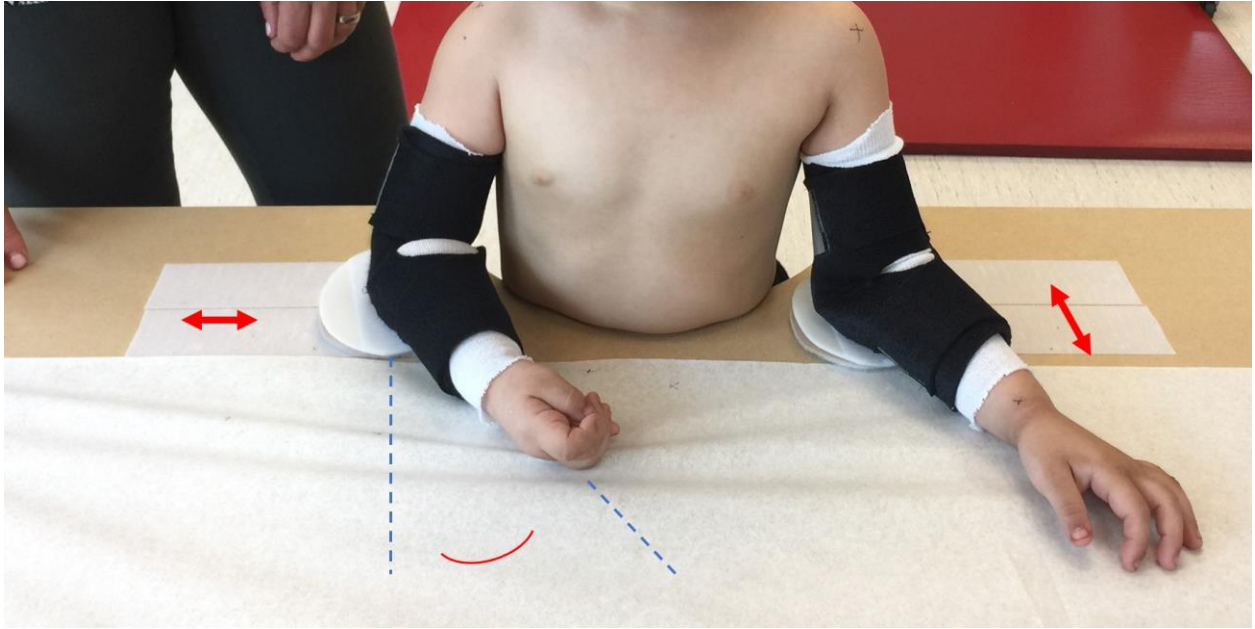

**Supplementary Table 1:** Details on all patients in the case series including age at initial presentation, AMS score at initial presentation, Sup-ER protocol details, other treatment and age at surgeries, and the pertinent measurements from the study visit.
