# Supplementary material
Source: PubMed Central journal article supplement (PMC9112750)
Supplement: Supplementary_Table_1.pdf [file Supplementary_Table_1.pdf]

| Participant # | Sex | Year of birth | Affected side | Age at initial presentation (in weeks) | AMS Scores at initial presentation |                    |                  |                   |                   |               |                 |           |            |               |                 |                |                  |               | Outcomes recorded at study visit |                               |                                            |                                          |                                   |                                            |                                          |                                          |                                        |                                          | Sup-ER Splint Start (Age in Weeks) | Sup-ER Splint worn (Months) | Post Botox casting (weeks) | Sup-ER Protocol duration* | Age at BPEG  | Age at Botox | Age at NT | Age at TT | Age at Osteotomy |                                        |
|---------------|-----|---------------|---------------|----------------------------------------|------------------------------------|--------------------|------------------|-------------------|-------------------|---------------|-----------------|-----------|------------|---------------|-----------------|----------------|------------------|---------------|----------------------------------|-------------------------------|--------------------------------------------|------------------------------------------|-----------------------------------|--------------------------------------------|------------------------------------------|------------------------------------------|----------------------------------------|------------------------------------------|------------------------------------|-----------------------------|----------------------------|---------------------------|--------------|--------------|-----------|-----------|------------------|----------------------------------------|
|               |     |               |               |                                        | Shoulder abduction                 | Shoulder adduction | Shoulder flexion | External rotation | Internal rotation | Elbow flexion | Elbow extension | Pronation | Supination | Wrist Flexion | Wrist extension | Finger flexion | Finger extension | Thumb flexion | Thumb extension                  | Age at study visit (in years) | IR Active ROM Unaffected side (in degrees) | IR Active ROM Affected side (in degrees) | Can touch belly with affected arm | ER Active ROM Unaffected side (in degrees) | ER Active ROM Affected side (in degrees) | IR Strength Unaffected side (in Newtons) | IR Strength Affected side (in Newtons) | ER Strength Unaffected side (in Newtons) |                                    |                             |                            |                           |              |              |           |           |                  | ER Strength Affected side (in Newtons) |
| 1             | M   | 2013          | R             | 4                                      | 3                                  | 7                  | 3                | 2                 | 7                 | 2             | 7               | 7         | 2          | 7             | 3               | 7              | 7                | 7             | 7                                | 4.8                           | 72                                         | 69                                       | Y                                 | 65                                         | 55                                       | 66.0                                     | 44.0                                   | 44.0                                     | 22.0                               | 14                          | 9                          | N/A                       | Regular      |              |           |           |                  |                                        |
| 5             | F   | 2013          | L             | 10                                     | 3                                  | 7                  | 3                | 0                 | 7                 | 2             | 7               | 7         | 0          | 7             | 6               | 7              | 7                | 7             | 6                                | 4.8                           | 92                                         | 78                                       | Y                                 | 70                                         | 40                                       | 35.2                                     | 28.6                                   | 35.2                                     | 28.6                               | 16                          | 5                          | 3                         | Regular      |              | 5mo       |           |                  |                                        |
| 8             | F   | 2013          | L             | 6                                      | 0                                  | 0                  | 0                | 0                 | 0                 | 0             | 0               | 0         | 0          | 2             | 0               | 3              | 0                | 3             | 0                                | 4.5                           | 90                                         | 55                                       | Y                                 | 53                                         | 51                                       | 61.6                                     | 35.2                                   | 44.0                                     | 35.2                               | 18                          | 7                          | N/A                       | Regular      | 3.5mo        |           | 11mo      |                  |                                        |
| 10            | F   | 2012          | L             | 6                                      | 2                                  | 7                  | 2                | 0                 | 7                 | 1             | 7               | 7         | 0          | 7             | 5               | 7              | 7                | 7             | 7                                | 6.3                           | 92                                         | 85                                       | Y                                 | 67                                         | 45                                       | 70.4                                     | 44.0                                   | 61.6                                     | 66.0                               | 6                           | 6                          | N/A                       | Regular      |              |           |           |                  |                                        |
| 13            | F   | 2009          | L             | 14                                     | 2                                  | 7                  | 2                | 2                 | 7                 | 6             | 7               | 7         | 0          | 7             | 7               | 7              | 7                | 7             | 6                                | 9.1                           | 77                                         | 74                                       | Y                                 | 69                                         | 47                                       | 66.0                                     | 35.2                                   | 55.0                                     | 44.0                               | 19                          | 9                          | N/A                       | Regular      |              |           |           | 4y9mo            |                                        |
| 14            | M   | 2012          | L             | 3                                      | 2                                  | 7                  | 2                | 0                 | 7                 | 2             | 2               | 7         | 0          | 7             | 3               | 7              | 7                | 7             | 3                                | 5.9                           | 89                                         | 46                                       | N                                 | 63                                         | 30                                       | 66.0                                     | 35.2                                   | 83.6                                     | 44.0                               | 6                           | 10                         | 2                         | Regular      |              | 6mo       | 12mo      | 3y1mo            |                                        |
| 16            | F   | 2012          | L             | 8                                      | 5                                  | 7                  | 5                | 2                 | 7                 | 3             | 7               | 7         | 2          | 7             | 7               | 7              | 7                | 7             | 4                                | 6.2                           | 85                                         | 89                                       | Y                                 | 50                                         | 17                                       | 74.8                                     | 61.6                                   | 55.0                                     | 74.8                               | 8                           | 10                         | 3                         | Regular      |              | 1y1mo     |           |                  |                                        |
| 2             | F   | 2013          | R             | 8                                      | 0                                  | 0                  | 0                | 0                 | 0                 | 0             | 0               | 0         | 0          | 7             | 0               | 3              | 0                | 2             | 0                                | 4.5                           | 65                                         | 40                                       | N                                 | 54                                         | -5                                       | 35.2                                     | 30.8                                   | 26.4                                     | 8.8                                | 8                           | 13                         | 5                         | Long         | 6mo          | 1y4mo     |           |                  |                                        |
| 3             | M   | 2011          | R             | 9                                      | 2                                  | 7                  | 2                | 0                 | 7                 | 1             | 7               | 7         | 0          | 7             | 7               | 7              | 7                | 7             | 7                                | 7.2                           | 80                                         | 78                                       | Y                                 | 62                                         | 20                                       | 79.2                                     | 44.0                                   | 68.2                                     | 70.4                               | 11                          | 12                         | 6                         | Long         |              | 12mo      |           |                  |                                        |
| 6             | F   | 2012          | R             | 6                                      | 0                                  | 2                  | 0                | 0                 | 0                 | 0             | 2               | 3         | 0          | 7             | 0               | 7              | 2                | 7             | 2                                | 5.7                           | 79                                         | 52                                       | N                                 | 65                                         | 53                                       | 70.4                                     | 44.0                                   | 61.6                                     | 35.2                               | 6                           | 12                         | N/A                       | Long         | 3mo          |           | 11mo      | 2y7mo            |                                        |
| 7             | F   | 2011          | R             | 12                                     | 2                                  | 7                  | 2                | 0                 | 7                 | 3             | 7               | 7         | 0          | 7             | 6               | 7              | 7                | 7             | 7                                | 7.2                           | 90                                         | 73                                       | Y                                 | 72                                         | 20                                       | 88.0                                     | 35.2                                   | 44.0                                     | 44.0                               | 12                          | 1                          | 12                        | Long         |              | 4mo       |           | 6y0m             | 6y0m                                   |
| 4             | F   | 2008          | R             | 9                                      | 2                                  | 7                  | 2                | 0                 | 7                 | 2             | 7               | 7         | 0          | 7             | 6               | 7              | 7                | 7             | 7                                | 10.1                          | 70                                         | 81                                       | Y                                 | 85                                         | -2                                       | 114.0                                    | 72.6                                   | 79.2                                     | 66.0                               | 14                          | 4                          | N/A                       | Short        |              |           |           |                  |                                        |
| 11            | F   | 2011          | R             | 23                                     | 2                                  | 7                  | 2                | 0                 | 7                 | 2             | 6               | 7         | 0          | 7             | 2               | 7              | 7                | 7             | 6                                | 6.7                           | 82                                         | 58                                       | N                                 | 66                                         | 30                                       | 44.0                                     | 30.8                                   | 44.0                                     | 35.2                               | 23                          | 5                          | N/A                       | Short        |              |           |           | 3y2mo            |                                        |
| 15            | F   | 2008          | R             | 4                                      | 2                                  | 7                  | 2                | 0                 | 7                 | 2             | 7               | 7         | 0          | 7             | 5               | 7              | 7                | 7             | 7                                | 9.6                           | 83                                         | 70                                       | N                                 | 63                                         | 25                                       | 101.0                                    | 79.2                                   | 101.0                                    | 66.0                               | 17                          | 2                          | N/A                       | Short        |              |           |           |                  |                                        |
| 9             | F   | 2011          | L             | 45                                     | 2                                  | 7                  | 2                | 0                 | 7                 | 2             | 7               | 7         | 0          | 7             | 3               | 0              | 0                | 0             | 0                                | 7.0                           | 84                                         | 30                                       | N                                 | 65                                         | 20                                       | 79.2                                     | 35.2                                   | 61.6                                     | 35.2                               | 53                          | 21                         | 10                        | Not followed | 11mo         | 11mo      | 11mo      |                  |                                        |
| 17            | F   | 2006          | R             | 23                                     | 5                                  | 7                  | 5                | 0                 | 7                 | 5             | 3               | 7         | 0          | 7             | 0               | 7              | 0                | 7             | 0                                | 11.6                          | 88                                         | 87                                       | Y                                 | 50                                         | -3                                       | 105.0                                    | 35.2                                   | 61.6                                     | 8.8                                | 59                          | 3                          | N/A                       | Not followed | 6mo          |           | 1y5mo     | 6y               |                                        |

\* Based on the Sup-ER splint time period and post-Botox casting duration, the Sup-ER Protocol for each participant was recorded as shorter than regular (splint started after 20 weeks of age, or used for 4 or less months and/or cast <3 weeks), regular (splint started by 20 weeks of age and used for 5-10 months and/or cast 3-5 weeks), longer than regular (splint started by 20 weeks of age and worn for >10 months and/or cast >5 weeks), or not followed (splint started later than 12 months of age).
